# Supplementary material for: Trapping a pseudo-Hofmann rearrangement on a ruthenium cluster
Source: Royal Society of Chemistry journal article supplement (doi:10.1039/b611338a), 2006-10-17
Supplement: b611338a.pdf [file b611338a.pdf]

Supporting Information for

## Trapping a pseudo-Hofmann rearrangement on a ruthenium cluster

Daniele Belletti,<sup>a</sup> Pierre Braunstein,<sup>b</sup> Abdelatif Messaoudi,<sup>b</sup> Roberto Pattacini,<sup>ab\*</sup>  
Giovanni Predieri,<sup>a</sup> Antonio Tiripicchio.<sup>a</sup>

<sup>a</sup> *Dipartimento di Chimica Generale ed Inorganica, Chimica Analitica, Chimica Fisica, Parco Area delle Scienze 17/A, I-43100 Parma, Italy Fax: +39 0521 90555; Tel: +39 0521 905418; E-mail: rpattacini@virgilio.it*

<sup>b</sup> *Laboratoire de Chimie de Coordination, Université Louis Pasteur, 4, Rue Blaise Pascal, F-67000 Strasbourg, France.*

### 1. Experimental

#### 1.1 General Considerations

Ru<sub>3</sub>CO<sub>12</sub> and Ph<sub>3</sub>PNSiMe<sub>3</sub> were purchased pure (Aldrich) and used without prior purification. The solvents were dried and distilled by standard techniques before use. The products were isolated by means of preparative TLC (20x20 cm silica plates, 1mm). The NMR spectra (chemical shifts in ppm) were recorded on Bruker instruments [Avance 300 for <sup>1</sup>H (TMS as internal reference), AMX400 for <sup>31</sup>P (H<sub>3</sub>PO<sub>4</sub> 85% as external reference) at 300 and 161.98 Mhz, respectively]. The FTIR spectra of the pure solids were recorded on a Nicolet NEXUS spectrometer equipped with a Continuum FTIR microspectrometer. Elemental (C, H, N) analyses were performed on a Carlo Erba EA 1108 instrument.

#### 1.2. Synthesis

##### Synthesis of compounds 2 and 3

A suspension of solid Ph<sub>3</sub>PNSiMe<sub>3</sub> (200 mg, 0.57 mmol) and Ru<sub>3</sub>(CO)<sub>12</sub> (300 mg, 0.47 mmol) in CH<sub>2</sub>Cl<sub>2</sub> (0.5 mL) was placed under vacuum in a teflon sealed tube and then heated to 130°C. The mixture turned to a brownish-red colour after 1 hour. The reaction was stopped after 2 h and the reaction mixture brought to 20°C. Solid Ph<sub>3</sub>PNSiMe<sub>3</sub> was added (1.1 mmol, 285 mg) and the reaction continued at 130°C for 1.5 h. A 0.4/0.6 mixture of compounds 2 and 3 (cumulative yield: 22%, based on Ru<sub>3</sub>(CO)<sub>12</sub>) was isolated by preparative TLC (2:1 hexane/CH<sub>2</sub>Cl<sub>2</sub> mixture as eluent) as a red microcrystalline solid. Compound 3 can be obtained pure following the same procedure and increasing the reaction time to 3h (yield: 19%, based on Ru<sub>3</sub>CO<sub>12</sub>).

**Compound 3:**

Elemental Analysis, calcd. (%) for  $C_{47}H_{39}N_2Cl_1O_9P_2Ru_3Si_1$ : N 2.33, C 46.87, H 3.26; found: N 2.34, C 46.92, H 3.23.  $^1H$  NMR (300 MHz,  $CDCl_3$ , 25°C, TMS):  $\delta$  = 0.26 (s, 9H;  $\mu_3$ -OSiMe<sub>3</sub>), 7.9-7.1 (m, 30H; Ph);  $^{31}P\{^1H\}$  NMR ( $CDCl_3$ )  $\delta$  = 59.8 (s,  $\mu$ -Ph<sub>3</sub>PN), 7.3 (s,  $\mu$ -Ph<sub>3</sub>PNCO); FTIR ( $cm^{-1}$ ): 2047 m(sh), 2034 vs, 2025 vs(sh), 2005 m(sh), 1969 s(sh), 1952 s(sh) [ $\nu$ (CO)], 1733 m [ $\nu$ ( $\mu$ -CO)], 1432 m [ $\nu$ ( $\mu$ -Ph<sub>3</sub>NCO)], 1257 m [ $\nu$ (Ph<sub>3</sub>P=NCO)], 1110 [ $\mu_3$ -N=P], 852 w [ $\nu$ (O-Si)].

**Compound 2:**

Elemental Analysis, calcd. (%) for  $0.4 \cdot (C_{48}H_{39}N_3O_{10}P_2Ru_3Si_1) + 0.6 \cdot (C_{47}H_{39}N_2Cl_1O_9P_2Ru_3Si_1)$ : N 2.78, C 47.16, H 3.25; found: N 2.81, C 47.21, H 3.23. Spectroscopic data deduced by comparison with those of pure **3**:  $^1H$  NMR ( $CDCl_3$ , 25°C):  $\delta$  = 0.26 (s, 9H;  $\mu_3$ -OSiMe<sub>3</sub>), 7.9-7.1 (m, 30H; Ph);  $^{31}P\{^1H\}$  NMR ( $CDCl_3$ , 25°C):  $\delta$  = 58.5 (s,  $\mu$ -Ph<sub>3</sub>PN), 6.8 (s,  $\mu$ -Ph<sub>3</sub>PNCO); FTIR ( $cm^{-1}$ ): 2047 m(sh), 2029 vs, 2007 vs, 2005 m(sh), 1969 s(sh), 1954 s(sh) [ $\nu$ (CO)]; 2177 s [ $\nu$ ( $\mu$ -NCO)].

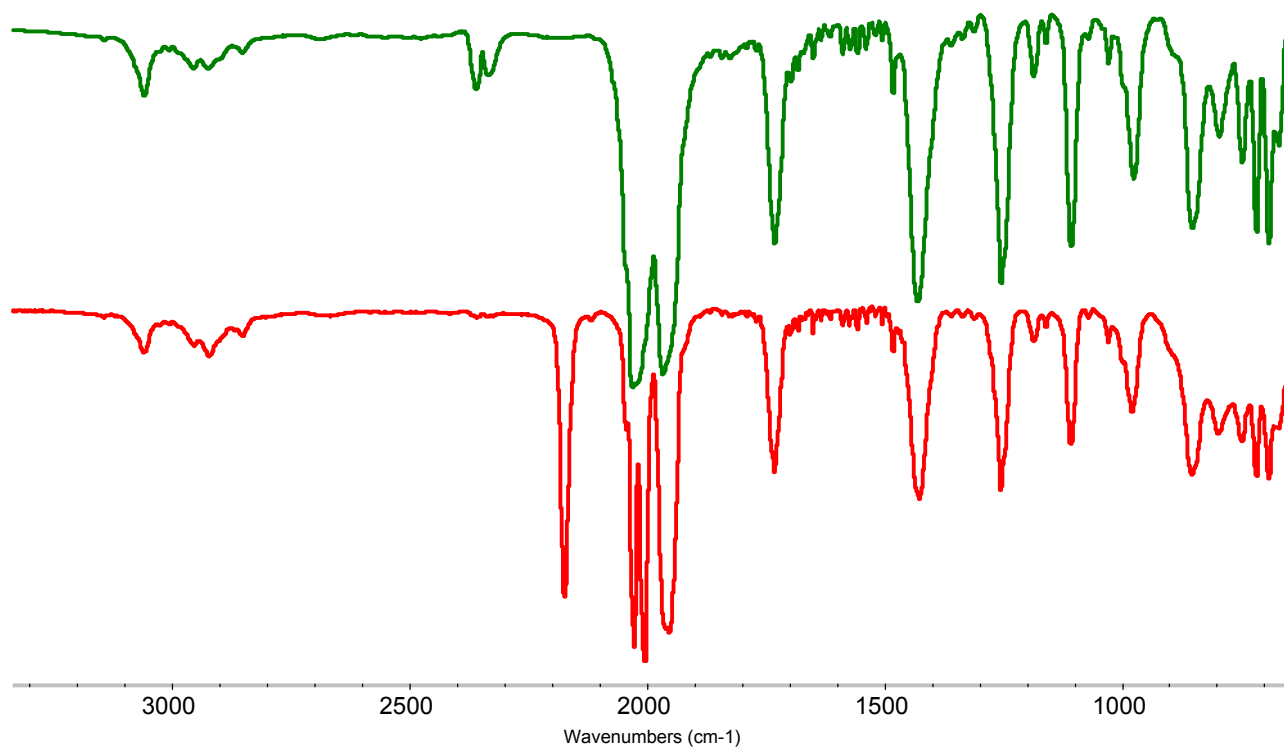

**Figure S-1:** Comparison between the infrared spectra of (a) pure compound **3**, (b) monocystal of a mixture of compounds **2** and **3**.

## 2. Computational details

All calculations were done using the program system TURBOMOLE.<sup>S1</sup> If not mentioned explicitly otherwise, we used the DFT method with the Becke-Perdew functional (BP86).<sup>S2</sup> The Coulomb terms were treated by the RI-J approximation.<sup>S3</sup> For the structure optimizations we used SV(P) basis sets<sup>S4</sup> (single zeta for core orbitals, double zeta for the valence shells and one set of polarization functions for all centres except hydrogen). Single point energies were calculated with larger triple zeta valence plus polarization basis sets (TZVP).<sup>S5</sup> A comparison between selected crystallographic and computed distances and angles for compound **2** is reported in table S-1. Cartesian coordinates and total energies for optimized models **4a**, **4b**, **5a**, **5b** are reported in table S-2. Cartesian coordinates for model  $[\text{Ru}_3(\mu_3\text{-NPPh}_3)(\mu_3\text{-NSiMe}_3)(\mu\text{-NCO})(\mu_{\text{C,O}}\text{-OC=NPPh}_3)(\mu\text{-CO})(\text{CO})_6]$ , are reported in table S-3. The electronic occupation of the frontier orbitals is reported in table S-4. Input and optimized Cartesian coordinates for model **6** are reported in table S-5.

**Table S-1:** Comparison between computed (model **5a**) and crystallographic bond distances and angles for compound **2**.

| $[\text{Ru}_3(\mu_3\text{-NPPh}_3)(\mu_3\text{-OSiMe}_3)(\mu\text{-NCO})(\mu_{\text{C,O}}\text{-OC=NPPh}_3)(\mu\text{-CO})(\text{CO})_6]$ |                  |          |             |                  |          |
|-------------------------------------------------------------------------------------------------------------------------------------------|------------------|----------|-------------|------------------|----------|
| E = -4028.0377279230 H = -109608.5458296 eV                                                                                               |                  |          |             |                  |          |
| HOMO-LUMO gap (eV) = 1.66                                                                                                                 |                  |          |             |                  |          |
| Distances (Å)                                                                                                                             | Crystallographic | Computed | Angles (°)  | Crystallographic | Computed |
| Ru1...Ru2                                                                                                                                 | 3.2189(6)        | 3.280    | Ru2-Ru3-Ru1 | 65.26(1)         | 65.70    |
| Ru1...Ru3                                                                                                                                 | 3.0815(6)        | 3.119    | O8-C8-N1    | 178(3)           | 178.5    |
| Ru2-Ru3                                                                                                                                   | 2.8789(7)        | 2.924    | C9-N2-P1    | 126.3(4)         | 126.30   |
| P1-N2                                                                                                                                     | 1.619(4)         | 1.634    | O9-C9-N2    | 121.3(5)         | 123.44   |
| N2-C9                                                                                                                                     | 1.345(6)         | 1.356    | O9-C9-Ru1   | 118.5(4),        | 117.07   |
| O9-C9                                                                                                                                     | 1.255(5)         | 1.267    | N2-C9-Ru1   | 120.0(4)         | 119.41   |
| Ru1-N1                                                                                                                                    | 2.18(4)          | 2.243    | C9-O9-Ru2   | 117.0(3)         | 117.22   |
| Ru3-N1                                                                                                                                    | 2.31(4)          | 2.277    |             |                  |          |
| N1-C8                                                                                                                                     | 1.22(5)          | 1.221    |             |                  |          |
| O8-C8                                                                                                                                     | 1.159(16)        | 1.194    |             |                  |          |
| Ru2-C5                                                                                                                                    | 2.031(5)         | 2.064    |             |                  |          |
| Ru3-C5                                                                                                                                    | 2.044(5)         | 2.061    |             |                  |          |
| Ru1-N3                                                                                                                                    | 2.199(3)         | 2.229    |             |                  |          |
| Ru2-N3                                                                                                                                    | 2.180(3)         | 2.203    |             |                  |          |
| Ru3-N3                                                                                                                                    | 2.202(4)         | 2.233    |             |                  |          |
| Ru1-O10                                                                                                                                   | 2.160(3)         | 2.207    |             |                  |          |
| Ru2-O10                                                                                                                                   | 2.184(3)         | 2.229    |             |                  |          |
| Ru3-O10                                                                                                                                   | 2.194(3)         | 2.236    |             |                  |          |
| Si1-O10                                                                                                                                   | 1.688(3)         | 1.738    |             |                  |          |

**Table S-2:** Energies and Cartesian coordinates obtained from BP86/TZVP||BP86/SV(P) calculations for the species **4a**, **4b**, **5a (2)** and **5b**

**Model 4a**

**Total energy = -2641.2328156030 H = -71871.6426385 eV**

**HOMO-LUMO gap (eV) = +1.65903 eV**

|    |            |            |            |    |            |            |            |
|----|------------|------------|------------|----|------------|------------|------------|
| O  | -1.8644433 | 0.1469779  | -4.5711264 | Ru | -1.9135585 | 0.1789725  | -0.2837721 |
| C  | -1.3986974 | 0.1614498  | -3.4762355 | P  | -0.2114404 | 3.0339890  | 0.0025220  |
| O  | 2.3035364  | 2.4260725  | -2.9624698 | N  | -0.1259657 | 1.4249440  | 0.0423838  |
| O  | 2.4688529  | -1.7631739 | -3.1417148 | O  | -0.0922900 | -1.1106698 | 0.0345085  |
| C  | 1.8193449  | 1.5626662  | -2.3461309 | Si | -0.0593437 | -2.8456486 | 0.0226305  |
| C  | 1.9059239  | -1.0192220 | -2.4479251 | C  | 1.7037462  | -3.3813181 | 0.4585206  |
| N  | -0.9439623 | 0.1808931  | -2.3406289 | H  | 1.7925793  | -4.4897828 | 0.3936466  |
| H  | 0.1688164  | -3.1740603 | -2.4852230 | H  | -1.1312763 | 3.6213159  | 0.9301429  |
| H  | -1.5565986 | -3.1069443 | -1.9914280 | H  | 1.0111892  | 3.7317386  | 0.2859846  |
| H  | -0.6015895 | 3.6066353  | -1.2532340 | O  | 2.3283169  | 0.1942684  | 1.2271441  |
| H  | -0.5866348 | -4.5843019 | -1.6751984 | H  | -2.3263522 | -3.2268724 | 1.0869058  |
| C  | -0.5502047 | -3.4707246 | -1.6926785 | H  | 1.9736108  | -3.0771216 | 1.4930699  |
| Ru | 1.0319000  | 0.2233744  | -1.3525125 | H  | -1.2397931 | -4.6406267 | 1.2616589  |
| H  | 6.2447207  | 0.1172268  | 0.2797461  | C  | -1.2775237 | -3.5273119 | 1.2985559  |
| N  | 3.8884099  | 0.2067678  | -0.4445467 | H  | 4.9241451  | -1.0079980 | 1.6945289  |
| O  | -4.0389707 | 2.2967130  | -0.5414983 | Ru | 0.1052164  | 0.2133280  | 1.8394223  |
| O  | -4.0958216 | -1.8927722 | -0.6591177 | C  | -1.9555621 | 0.1535244  | 1.7815009  |
| H  | 4.9965092  | 1.2144326  | 1.7753387  | H  | -1.0369960 | -3.2236215 | 2.3392703  |
| H  | 2.4518747  | -2.9424471 | -0.2375143 | O  | -2.8123592 | 0.1195686  | 2.6135806  |
| C  | -3.2513115 | -1.1047917 | -0.5085621 | C  | 0.2897411  | -1.0234686 | 3.2285582  |
| C  | -3.2236075 | 1.4666313  | -0.4404628 | C  | 0.1691371  | 1.5394553  | 3.1176164  |
| C  | 2.5908458  | 0.2142210  | -0.0237366 | O  | 0.4301322  | -1.7723843 | 4.1105963  |
| P  | 4.9318689  | 0.1362973  | 0.8261319  | O  | 0.2118226  | 2.3994442  | 3.9075284  |

**Model 4b**

**Total energy = -2641.2358732450 H = -71871.7258412 eV;**

**HOMO-LUMO gap (eV) = +1.51508 eV**

|    |            |            |            |    |            |            |            |
|----|------------|------------|------------|----|------------|------------|------------|
| O  | 4.3749983  | 0.1327799  | 2.3467499  | Ru | 1.6440029  | 0.1595746  | -0.9399285 |
| C  | 3.3026173  | 0.1609567  | 1.8327972  | P  | 0.1655666  | 3.0247671  | -0.0956187 |
| O  | 0.1607038  | 2.4765810  | 3.8064240  | N  | 0.0610644  | 1.4163601  | -0.0556495 |
| O  | 0.1526816  | -1.7110528 | 4.1025282  | O  | 0.0303611  | -1.1080442 | 0.0069294  |
| C  | 0.1288122  | 1.6050000  | 3.0330390  | Si | -0.0044088 | -2.8416813 | 0.0561806  |
| C  | 0.1289834  | -0.9785869 | 3.2006186  | C  | -1.6493650 | -3.3535336 | 0.8438884  |
| N  | 2.2142677  | 0.1949358  | 1.2733345  | H  | -1.7135648 | -4.4629717 | 0.9137765  |
| H  | 1.3749415  | -3.2211623 | 2.1562688  | H  | 0.2890580  | 3.5951438  | -1.4034553 |
| H  | 2.4210336  | -3.0432640 | 0.7063698  | H  | -0.9506856 | 3.7424085  | 0.4555800  |
| H  | 1.2717459  | 3.5926481  | 0.6175047  | O  | -2.7595999 | 0.2099240  | 2.8023798  |
| H  | 1.5236150  | -4.5732788 | 0.9884750  | H  | 1.0605240  | -3.2559965 | -2.2055526 |
| C  | 1.4612061  | -3.4642062 | 1.0758709  | H  | -2.5100167 | -3.0043661 | 0.2318685  |
| Ru | 0.0798610  | 0.2480785  | 1.7842289  | H  | 0.1179264  | -4.6628937 | -1.6198242 |
| H  | -4.7247220 | -1.0226857 | 1.5733006  | C  | 0.1194001  | -3.5507358 | -1.6930004 |
| N  | -2.5626388 | 0.2346058  | 0.5739419  | H  | -4.8260400 | 0.1141669  | -0.3453290 |
| O  | 3.4517118  | 2.2574857  | -2.1237631 | Ru | -1.2909149 | 0.2091620  | -1.2864301 |
| O  | 3.5590104  | -1.9307420 | -2.0156658 | C  | 0.3666905  | 0.1158156  | -2.5471232 |
| H  | -4.8581680 | 1.2295518  | 1.5827891  | H  | -0.7298978 | -3.2618781 | -2.3476876 |
| H  | -1.7636351 | -2.9437666 | 1.8714784  | O  | 0.4983890  | 0.0553455  | -3.7342252 |
| C  | 2.8157510  | -1.1349522 | -1.6024167 | C  | -2.2946193 | -1.0312431 | -2.2554552 |
| C  | 2.7582416  | 1.4339311  | -1.6713638 | C  | -2.1034751 | 1.5388368  | -2.2670355 |
| C  | -1.9634291 | 0.2410571  | 1.8271658  | O  | -2.9507098 | -1.7851649 | -2.8568976 |
| P  | -4.1962593 | 0.1410329  | 0.9353903  | O  | -2.6123146 | 2.4036147  | -2.8669633 |

### Model 5a

Total energy = -4028.0499182260 H = -109608.8775448 eV;  
HOMO-LUMO gap (eV) = +1.68715 eV

|   |            |            |            |    |            |            |            |
|---|------------|------------|------------|----|------------|------------|------------|
| H | -2.6936057 | 4.0228597  | -5.3736021 | C  | -1.0368555 | 3.0963350  | 0.8556068  |
| H | -3.4304373 | 1.6749980  | -4.8507530 | H  | 5.7093974  | 1.9478633  | 1.9143545  |
| C | -2.5670279 | 3.6166170  | -4.3563976 | H  | 5.8052359  | -2.1032216 | 0.7554361  |
| C | -2.9801944 | 2.3043947  | -4.0659119 | C  | 1.1654546  | 4.0256790  | 1.3485477  |
| H | -1.6582503 | 5.4357390  | -3.5741439 | H  | -1.9708554 | -4.7896549 | 1.3927336  |
| H | 8.3053327  | -1.6299204 | -3.6415228 | H  | 2.0841246  | -3.2161348 | 1.3214864  |
| C | -2.4251385 | -1.7977610 | -3.3681222 | H  | -0.4543255 | -5.7346911 | 1.5229927  |
| C | -1.9869316 | 4.4073485  | -3.3502307 | C  | -0.8709718 | -4.7008610 | 1.5173652  |
| H | 5.8936345  | -2.1629638 | -4.1036932 | C  | 4.5146504  | -0.5303914 | 1.5533276  |
| C | 7.5184536  | -1.2725513 | -2.9565918 | C  | -6.3394696 | 2.4558203  | 1.7729361  |
| C | 6.1703324  | -1.5713520 | -3.2158645 | H  | -7.3460124 | 2.5864625  | 2.2035750  |
| H | 3.8455421  | 4.9197862  | -1.6745987 | C  | 5.3206401  | -1.6860262 | 1.6524599  |
| C | -2.8143143 | 1.7817981  | -2.7739602 | C  | -1.6177267 | 4.0464234  | 1.7245522  |
| C | 0.3376457  | 0.8190708  | -2.5732123 | H  | -2.7068145 | 4.0612799  | 1.8819742  |
| C | 0.9938254  | -1.6356383 | -2.5938938 | C  | -2.6279388 | -1.4011296 | 1.9022482  |
| H | -3.1144130 | 0.7451470  | -2.5571489 | C  | -4.0584585 | 1.6237386  | 1.9589671  |
| H | 8.9218311  | -0.2701070 | -1.6214876 | C  | 0.5822884  | 4.9620894  | 2.2202057  |
| C | 7.8654688  | -0.5115220 | -1.8249916 | H  | -0.6720889 | -4.2590030 | 2.5156905  |
| C | -1.8171008 | 3.8903611  | -2.0547748 | H  | 3.2221895  | 0.8567693  | 2.6408512  |
| H | 0.0220805  | -4.1857712 | -2.4091082 | H  | -3.2940120 | 1.1074907  | 2.5542453  |
| H | -1.5765319 | -4.6259588 | -1.7196910 | C  | -0.8096180 | 4.9728633  | 2.4042786  |
| C | 5.1636602  | -1.1132772 | -2.3480324 | C  | -5.3379165 | 1.7980234  | 2.5069760  |
| H | 3.3580177  | 2.4628429  | -1.7145785 | H  | 1.2171379  | 5.6858377  | 2.7579231  |
| H | 4.1023650  | -1.3279838 | -2.5477590 | C  | 3.8850393  | -0.0189683 | 2.7119348  |
| C | 4.2586528  | 4.2672453  | -0.8881222 | H  | -1.2752113 | 5.7026178  | 3.0869562  |
| C | -2.2265714 | 2.5718723  | -1.7605681 | C  | -0.0017114 | -1.7408367 | 3.1093940  |
| H | -0.1591051 | -5.6922686 | -1.4521963 | C  | -0.8677450 | 0.6206418  | 3.0567223  |
| C | -0.4825620 | -4.6282258 | -1.5250010 | C  | 5.5061628  | -2.3124988 | 2.8969616  |
| H | -1.3604692 | 4.5183767  | -1.2736380 | H  | -5.5505261 | 1.4066681  | 3.5148750  |
| C | 3.9839830  | 2.8906731  | -0.9142086 | H  | 6.1344903  | -3.2157045 | 2.9637974  |
| H | 5.2680608  | 5.8923413  | 0.1555205  | C  | 4.0815279  | -0.6447576 | 3.9517278  |
| C | 6.8657731  | -0.0519699 | -0.9536823 | C  | 4.8915650  | -1.7912399 | 4.0470434  |
| C | 5.5108188  | -0.3560980 | -1.2111329 | H  | 3.5842873  | -0.2420610 | 4.8492015  |
| C | 5.0529064  | 4.8111304  | 0.1376966  | H  | 5.0364042  | -2.2839774 | 5.0225488  |
| H | -4.5725048 | 3.1477228  | -1.0806255 | O  | -2.8470085 | -2.1987211 | -4.4097885 |
| H | 7.1462508  | 0.5513107  | -0.0741388 | O  | 0.6784995  | 1.6957737  | -3.2651878 |
| C | 4.5077014  | 2.0467379  | 0.0907124  | O  | 1.6698110  | -2.2404679 | -3.3280842 |
| H | 2.3325597  | -3.1408072 | -0.4555214 | N  | -2.0173569 | -1.3688862 | -2.2994184 |
| C | -3.5669363 | -3.1818751 | -0.1873114 | Ru | -0.0733444 | -0.6059290 | -1.4725006 |
| C | -4.4876440 | -0.8408928 | -0.2640773 | N  | 2.7889433  | -0.0521420 | -0.8809121 |
| H | -6.8332644 | 3.4586391  | -0.0969331 | O  | -5.5979962 | -0.4961307 | -0.3683543 |
| C | 1.5670278  | -0.1612478 | -0.3020452 | O  | -4.0999319 | -4.2193854 | -0.2182310 |
| H | 0.8316968  | 2.3689133  | -0.0100428 | P  | 4.1949014  | 0.2410680  | -0.0845716 |
| C | 5.5699250  | 3.9748049  | 1.1420557  | Ru | -2.7652925 | -1.5018533 | -0.1505917 |
| C | -4.7758523 | 2.7669666  | -0.0682969 | P  | -2.0797212 | 1.8840095  | -0.0611634 |
| H | 6.1881778  | 4.3972358  | 1.9512633  | N  | -1.4983848 | 0.3398864  | -0.0412258 |
| C | 5.3019633  | 2.5947347  | 1.1204802  | O  | -0.6232368 | -2.1147955 | 0.0455803  |
| C | 1.8193606  | -3.7001916 | 0.3560699  | Si | -0.0541533 | -3.7531871 | 0.0973641  |
| H | 2.2295729  | -4.7356921 | 0.3699799  | O  | 1.3748650  | -0.0580654 | 0.9474811  |
| C | -6.0539250 | 2.9424874  | 0.4874500  | Ru | -0.7057750 | -0.6706199 | 1.7499508  |
| C | 0.3629309  | 3.0977905  | 0.6668998  | O  | -3.3431219 | -1.6809313 | 2.8211071  |
| C | -3.7660611 | 2.0982413  | 0.6597203  | O  | 0.4452235  | -2.3682462 | 3.9862351  |
| H | 2.2559910  | 4.0150021  | 1.1941204  | O  | -0.9420189 | 1.4033748  | 3.9224807  |

### Model 5b

Total energy = -4028.0348748820 H = -109608.4681944 eV;  
HOMO-LUMO gap (eV) = +1.67104 eV

|   |            |            |            |    |            |            |            |
|---|------------|------------|------------|----|------------|------------|------------|
| H | -4.5853919 | 3.0848729  | -5.0111910 | C  | -0.3896190 | 3.1529651  | -0.0147815 |
| H | -5.1989884 | 1.0799635  | -3.6158141 | H  | 5.6243500  | 2.1209206  | 0.3307536  |
| C | -4.0358935 | 2.8680962  | -4.0800918 | H  | 5.5263772  | -0.5762518 | 2.0237208  |
| C | -4.3813797 | 1.7490800  | -3.3022508 | C  | 1.6825773  | 4.0800340  | -0.9192639 |
| H | -2.7131950 | 4.5879717  | -4.2744399 | H  | -1.4049357 | -4.2792995 | 2.4216421  |
| H | 6.7191217  | -4.5992657 | -0.7362723 | H  | 2.2878563  | -3.8366760 | 0.3883973  |
| C | -3.5557722 | -1.9831720 | -2.3707228 | H  | -0.2581312 | -5.5862072 | 1.9877430  |
| C | -2.9883864 | 3.7084706  | -3.6691573 | C  | -0.4019927 | -4.4806864 | 1.9890583  |
| H | 5.2236399  | -4.3313864 | 1.2650740  | C  | 3.9029202  | 0.8086825  | 1.5425242  |
| C | 6.1032829  | -3.6915989 | -0.6233636 | C  | -4.8128986 | 3.4843331  | 3.0675112  |
| C | 5.2687197  | -3.5422420 | 0.4964533  | H  | -5.5320327 | 3.8631457  | 3.8125767  |
| H | 4.1369966  | 2.7851955  | -4.4018642 | C  | 4.9496826  | 0.3041494  | 2.3450646  |
| C | -3.6793999 | 1.4694670  | -2.1202733 | C  | -0.4125886 | 4.1851451  | 0.9489582  |
| C | -0.5666886 | 0.2537289  | -3.0971681 | H  | -1.2299959 | 4.2387443  | 1.6843586  |
| C | -0.0978869 | -2.2373012 | -2.9327647 | C  | -1.6462477 | -1.0401287 | 2.4518937  |
| H | -3.9494638 | 0.5865419  | -1.5231227 | C  | -2.8911554 | 2.0962794  | 2.5054981  |
| H | 6.7886940  | -2.8013075 | -2.4907697 | C  | 1.6490522  | 5.1083954  | 0.0392940  |
| C | 6.1454706  | -2.6840701 | -1.6030689 | H  | 0.3576048  | -4.0477692 | 2.6741085  |
| C | -2.2792948 | 3.4308857  | -2.4881757 | H  | 2.4116751  | 2.3876301  | 1.3343901  |
| H | -1.3557196 | -4.4973323 | -1.9713582 | H  | -2.1247387 | 1.3848184  | 2.8347307  |
| H | -2.4760178 | -4.7224490 | -0.5874702 | C  | 0.6053056  | 5.1537377  | 0.9772405  |
| C | 4.4796450  | -2.3887051 | 0.6409542  | C  | -3.8046116 | 2.5854646  | 3.4526501  |
| H | 3.0719392  | 1.0069265  | -3.0118462 | H  | 2.4426913  | 5.8738113  | 0.0547627  |
| H | 3.8275942  | -2.2871047 | 1.5232830  | C  | 3.2118804  | 1.9668600  | 1.9631705  |
| C | 4.4659917  | 2.6421066  | -3.3592172 | H  | 0.5730101  | 5.9526170  | 1.7364342  |
| C | -2.6138659 | 2.3015773  | -1.7098380 | C  | 1.2352666  | -1.4293305 | 2.6435112  |
| H | -1.1430676 | -5.8900606 | -0.8624873 | C  | 0.3296592  | 0.9618387  | 2.6316646  |
| C | -1.4169651 | -4.8103416 | -0.9082767 | C  | 5.2756068  | 0.9307953  | 3.5603567  |
| H | -1.4608733 | 4.1006062  | -2.1810830 | H  | -3.7253756 | 2.2487912  | 4.4988191  |
| C | 3.8532392  | 1.6461003  | -2.5791675 | H  | 6.0894163  | 0.5201119  | 4.1804782  |
| H | 5.9747258  | 4.2149053  | -3.4451040 | C  | 3.5443061  | 2.5912874  | 3.1744096  |
| C | 5.3646998  | -1.5269005 | -1.4620525 | C  | 4.5735669  | 2.0723904  | 3.9786376  |
| C | 4.5334452  | -1.3674458 | -0.3332859 | H  | 2.9850092  | 3.4845960  | 3.4946039  |
| C | 5.4926519  | 3.4396835  | -2.8262828 | H  | 4.8306683  | 2.5613270  | 4.9329584  |
| H | -4.0890456 | 3.7261268  | -0.2729443 | O  | -4.4031373 | -2.3578414 | -3.1221675 |
| H | 5.3940017  | -0.7468010 | -2.2382205 | O  | -0.5089793 | 0.9652395  | -4.0209582 |
| C | 4.2514846  | 1.4445158  | -1.2358596 | O  | 0.1651287  | -3.0197121 | -3.7531317 |
| H | 1.7912849  | -3.6195456 | -1.3188090 | N  | -2.7072882 | -1.5788371 | -1.5903228 |
| C | -3.4533643 | -2.8966575 | 1.1960290  | Ru | -0.5637135 | -0.9347193 | -1.6812856 |
| C | -4.1663720 | -0.4936755 | 1.0976014  | N  | 1.8198737  | -0.0792867 | -0.1471869 |
| H | -5.6960589 | 4.5911348  | 1.4108044  | O  | -5.2048502 | -0.0289509 | 1.3589550  |
| C | 1.4463679  | -0.5479053 | -1.3956126 | O  | -4.0418135 | -3.8418035 | 1.5435254  |
| H | 0.7173519  | 2.3019007  | -1.6975718 | P  | 3.5108479  | 0.1423956  | -0.1234291 |
| C | 5.9043202  | 3.2369575  | -1.4988343 | Ru | -2.5801382 | -1.3379639 | 0.6612692  |
| C | -3.9960883 | 3.4010692  | 0.7742920  | P  | -1.7623452 | 1.9229299  | -0.1197276 |
| H | 6.7122009  | 3.8499068  | -1.0658529 | N  | -1.2749484 | 0.3508226  | -0.0016013 |
| C | 5.2877631  | 2.2527330  | -0.7085116 | O  | -0.5514931 | -2.1535970 | 0.1431403  |
| C | 1.5492843  | -4.1557436 | -0.3758592 | Si | -0.2216821 | -3.8590772 | 0.2097280  |
| H | 1.7035080  | -5.2441445 | -0.5575085 | O  | 2.3205547  | -0.7518292 | -2.2699009 |
| C | -4.9047923 | 3.8912330  | 1.7263637  | Ru | 0.1157421  | -0.4728286 | 1.5021258  |
| C | 0.6750091  | 3.1029271  | -0.9439839 | O  | -1.9376788 | -1.1610305 | 3.6084260  |
| C | -2.9777753 | 2.4949527  | 1.1536621  | O  | 1.9534812  | -2.0120003 | 3.3586423  |
| H | 2.5024516  | 4.0313175  | -1.6533502 | O  | 0.4102403  | 1.8354987  | 3.4060318  |

**Table S-3** Energies and Cartesian coordinates obtained from BP86/TZVP||BP86/SV(P) calculations  
 for model  $[\text{Ru}_3(\mu_3\text{-NPPH}_3)(\mu_3\text{-NSiMe}_3)(\mu\text{-NCO})(\mu_{\text{C,O}}\text{-OC=NPPH}_3)(\mu\text{-CO})(\text{CO})_6]$

**Total energy = -4003.9047887300 H = -108951.8547680 eV**  
**HOMO-LUMO gap +0.38122 eV; Number of electrons = 519**

|   |            |            |            |    |            |            |            |
|---|------------|------------|------------|----|------------|------------|------------|
| H | -2.9305441 | 4.0170153  | -5.3796846 | C  | -0.9825812 | 3.1160600  | 0.7703890  |
| H | -3.5272440 | 1.6215664  | -4.8427488 | H  | 5.8144666  | 2.1393876  | 1.6099681  |
| C | -2.7620978 | 3.6191544  | -4.3697674 | H  | 5.5450973  | -2.0648197 | 1.1298892  |
| C | -3.0997523 | 2.2709749  | -4.0673157 | C  | 1.2712644  | 4.0817678  | 1.0471630  |
| H | -1.9233088 | 5.4845445  | -3.5908219 | H  | -1.9098701 | -4.6961069 | 1.5729407  |
| H | 8.1661988  | -2.3535075 | -3.2965959 | H  | 2.1262277  | -3.1987567 | 1.2779323  |
| C | -2.5682012 | -1.9249374 | -3.2456309 | H  | -0.5115553 | -5.8013996 | 1.4398913  |
| C | -2.1941568 | 4.4454311  | -3.3619462 | C  | -0.8055180 | -4.7378154 | 1.5642655  |
| H | 5.7141668  | -2.7282092 | -3.7728235 | C  | 4.4112384  | -0.2545817 | 1.6366277  |
| C | 7.4026823  | -1.8584020 | -2.6815197 | C  | -6.2566249 | 2.5151804  | 2.0027646  |
| C | 6.0230555  | -2.0704804 | -2.9491198 | H  | -7.2342167 | 2.6513716  | 2.4849967  |
| H | 3.9720359  | 4.7083251  | -2.3113435 | C  | 5.1153426  | -1.4568036 | 1.9349718  |
| C | -2.8730736 | 1.7533962  | -2.7668071 | C  | -1.4874689 | 4.0641990  | 1.7052912  |
| C | 0.2598444  | 0.7627944  | -2.6672689 | H  | -2.5496103 | 4.0703692  | 1.9749987  |
| C | 0.9208846  | -1.7256465 | -2.5506042 | C  | -2.6262286 | -1.4151229 | 1.9967772  |
| H | -3.0994594 | 0.6992789  | -2.5568213 | C  | -3.9399604 | 1.6871595  | 2.0738639  |
| H | 8.8575162  | -0.8258407 | -1.4117235 | C  | 0.7620334  | 5.0236748  | 1.9835488  |
| C | 7.7924149  | -0.9971344 | -1.6167951 | H  | -0.4377036 | -4.4013520 | 2.5497027  |
| C | -1.9700971 | 3.9291695  | -2.0589876 | H  | 3.2501405  | 1.4038351  | 2.4913261  |
| H | 0.2420427  | -4.4354722 | -2.2979222 | H  | -3.1422948 | 1.1844928  | 2.6321947  |
| H | -1.4882912 | -4.4396109 | -1.8405776 | C  | -0.6203495 | 5.0108811  | 2.3108626  |
| C | 5.0361129  | -1.4264345 | -2.1558017 | C  | -5.1977943 | 1.8704833  | 2.6998124  |
| H | 3.3745280  | 2.2882927  | -2.0154542 | H  | 1.4339478  | 5.7547971  | 2.4526876  |
| H | 3.9690842  | -1.5745197 | -2.3693216 | C  | 3.8396734  | 0.5033201  | 2.7025451  |
| C | 4.3728811  | 4.1483509  | -1.4560501 | H  | -1.0215793 | 5.7292812  | 3.0379362  |
| C | -2.3080364 | 2.5800999  | -1.7521143 | C  | 0.0650123  | -1.7970092 | 2.9991847  |
| H | -0.4177928 | -5.7682608 | -1.2964273 | C  | -0.7179742 | 0.6596452  | 3.0175685  |
| C | -0.4676558 | -4.6755614 | -1.4856547 | C  | 5.2597965  | -1.8883882 | 3.2803993  |
| H | -1.5255697 | 4.5813403  | -1.2984266 | H  | -5.3533944 | 1.5032424  | 3.7229474  |
| C | 4.0367364  | 2.7805503  | -1.2897483 | H  | 5.7977909  | -2.8202729 | 3.4989512  |
| H | 5.4929874  | 5.8502355  | -0.6495072 | C  | 3.9853938  | 0.0726295  | 4.0449023  |
| C | 6.8075236  | -0.3554071 | -0.8240003 | C  | 4.6991149  | -1.1239801 | 4.3390723  |
| C | 5.4241711  | -0.5724600 | -1.0880916 | H  | 3.5298041  | 0.6546057  | 4.8568255  |
| C | 5.2292634  | 4.7918257  | -0.5194121 | H  | 4.8028768  | -1.4616941 | 5.3790984  |
| H | -4.6498461 | 3.1362314  | -0.9814560 | O  | -2.9492235 | -2.4077433 | -4.2664539 |
| H | 7.1270071  | 0.3129935  | -0.0148267 | O  | 0.6002910  | 1.6018451  | -3.4044804 |
| C | 4.5542696  | 2.0422264  | -0.1856453 | O  | 1.5918475  | -2.3595935 | -3.2668629 |
| H | 2.3484143  | -3.2654994 | -0.5029510 | N  | -2.1755890 | -1.3909041 | -2.2188427 |
| C | -3.4514102 | -3.2044070 | -0.1008086 | Ru | -0.1175962 | -0.6441255 | -1.4630772 |
| C | -4.4681714 | -0.8112413 | -0.2320456 | N  | 2.7301828  | -0.0342901 | -0.8593732 |
| H | -6.8569257 | 3.4635789  | 0.1240965  | O  | -5.5852509 | -0.5038290 | -0.3484182 |
| C | 1.5042070  | -0.1847768 | -0.3133549 | O  | -3.9836486 | -4.2400685 | -0.1264453 |
| H | 0.8167922  | 2.4108252  | -0.2698709 | P  | 4.1416213  | 0.2621257  | -0.0965124 |
| C | 5.7450645  | 4.0578854  | 0.5841723  | Ru | -2.6940763 | -1.4928093 | -0.0873371 |
| C | -4.7837705 | 2.7851260  | 0.0478894  | P  | -2.0816646 | 1.9095589  | -0.0634275 |
| H | 6.4062310  | 4.5502824  | 1.3098831  | N  | -1.5049481 | 0.3740442  | -0.0446129 |
| C | 5.4114443  | 2.6876973  | 0.7499699  | N  | -0.6488349 | -2.0578869 | 0.0518316  |
| C | 1.8397983  | -3.7396704 | 0.3564481  | Si | -0.0501734 | -3.7423513 | 0.1236692  |
| H | 2.2014252  | -4.7861857 | 0.4399445  | O  | 1.3162251  | -0.0747052 | 0.9505510  |
| C | -6.0434202 | 2.9725452  | 0.6747233  | Ru | -0.6722974 | -0.6894552 | 1.6786508  |
| C | 0.4061798  | 3.1338757  | 0.4458871  | O  | -3.3045505 | -1.6900100 | 2.9291874  |
| C | -3.7186557 | 2.1378366  | 0.7384807  | O  | 0.5279035  | -2.4164358 | 3.8710830  |
| H | 2.3371808  | 4.0880359  | 0.7842662  | O  | -0.6763442 | 1.4240660  | 3.8982153  |

**Table S-4:** Electronic occupation of the frontier orbitals for model  $[\text{Ru}_3(\mu_3\text{-NPPh}_3)(\mu_3\text{-NSiMe}_3)(\mu\text{-NCO})(\mu_{\text{C,O}}\text{-OC=NPPh}_3)(\mu\text{-CO})(\text{CO})_6]$

| Nr.  | Orbital | Occupation | Energy                  |
|------|---------|------------|-------------------------|
| 536. | 268     |            | -0.074844 H = -2.037 eV |
| 535. | 268     |            | -0.074882 H = -2.038 eV |
| 534. | 267     |            | -0.076229 H = -2.074 eV |
| 533. | 267     |            | -0.076461 H = -2.081 eV |
| 532. | 266     |            | -0.079519 H = -2.164 eV |
| 531. | 266     |            | -0.079663 H = -2.168 eV |
| 530. | 265     |            | -0.080275 H = -2.184 eV |
| 529. | 265     |            | -0.080864 H = -2.200 eV |
| 528. | 264     |            | -0.081982 H = -2.231 eV |
| 527. | 264     |            | -0.082112 H = -2.234 eV |
| 526. | 263     |            | -0.087613 H = -2.384 eV |
| 525. | 263     |            | -0.087645 H = -2.385 eV |
| 524. | 262     |            | -0.094228 H = -2.564 eV |
| 523. | 262     |            | -0.094364 H = -2.568 eV |
| 522. | 261     |            | -0.096198 H = -2.618 eV |
| 521. | 261     |            | -0.096670 H = -2.631 eV |
| 520. | 260     |            | -0.150827 H = -4.104 eV |
| 519. | 260     | 1.000      | -0.164688 H = -4.481 eV |
| 518. | 259     | 1.000      | -0.189157 H = -5.147 eV |
| 517. | 259     | 1.000      | -0.192537 H = -5.239 eV |
| 516. | 258     | 1.000      | -0.196484 H = -5.347 eV |
| 515. | 258     | 1.000      | -0.198284 H = -5.396 eV |
| 514. | 257     | 1.000      | -0.199212 H = -5.421 eV |
| 513. | 257     | 1.000      | -0.201923 H = -5.495 eV |
| 512. | 256     | 1.000      | -0.211427 H = -5.753 eV |
| 511. | 255     | 1.000      | -0.211601 H = -5.758 eV |
| 510. | 256     | 1.000      | -0.213325 H = -5.805 eV |
| 509. | 255     | 1.000      | -0.215178 H = -5.855 eV |
| 508. | 254     | 1.000      | -0.216272 H = -5.885 eV |
| 507. | 254     | 1.000      | -0.218100 H = -5.935 eV |
| 506. | 253     | 1.000      | -0.218950 H = -5.958 eV |
| 505. | 253     | 1.000      | -0.221106 H = -6.017 eV |
| 504. | 252     | 1.000      | -0.225761 H = -6.143 eV |

**Table S-5:** Computational details for the DFT model **6** → **2** conversion

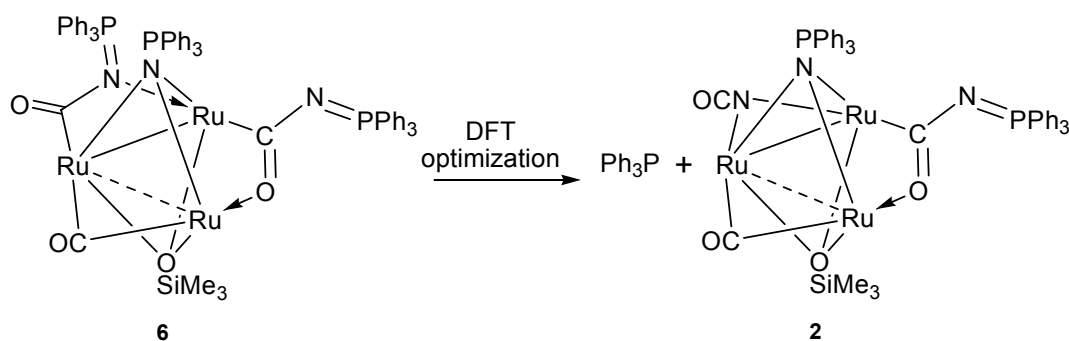



### Cartesian coordinates of the input model.

|   |            |            |            |    |            |            |            |
|---|------------|------------|------------|----|------------|------------|------------|
| H | -2.7433352 | 5.2553073  | 2.4278660  | H  | 2.8407035  | -4.9034598 | 0.6832467  |
| H | -2.8961946 | 2.8575329  | 3.2128592  | H  | 4.7495712  | 0.2869036  | -2.8601090 |
| C | -1.8627414 | 4.6004320  | 2.3762867  | H  | 4.0902737  | 0.3288908  | 3.5920929  |
| C | -1.9482358 | 3.2526211  | 2.8236244  | C  | 5.1647496  | 4.1606928  | 1.1985851  |
| H | -0.5655591 | 6.1282756  | 1.4974291  | C  | 4.0917808  | 1.0248649  | 5.6420182  |
| H | -1.4246760 | -0.9035622 | -8.5556965 | H  | 5.8519702  | 4.7684977  | -0.7889891 |
| C | -2.2919703 | -0.8272177 | 2.1688528  | C  | 4.6971023  | -0.5851200 | -3.5230904 |
| C | -0.6358048 | 5.0920346  | 1.8533453  | H  | 5.9669657  | 4.6871686  | 1.7323416  |
| H | -2.2225281 | -1.2781761 | -6.1900828 | C  | 4.1554028  | -2.5647480 | 0.3479690  |
| C | -0.7577949 | -0.6935308 | -7.7086478 | C  | 4.6577172  | -0.2669901 | 1.2268647  |
| C | -1.2068276 | -0.9045825 | -6.3770209 | C  | 4.5520209  | -2.9234576 | -5.1312004 |
| H | 1.5114165  | 5.1686580  | -3.8781735 | H  | 4.9332494  | 0.3778427  | 5.9231035  |
| C | -0.8135262 | 2.4057381  | 2.7527635  | H  | 4.4865047  | -3.8337091 | -5.7420329 |
| C | -0.5781162 | 1.4493160  | -0.4741251 | C  | 5.8063429  | -1.4645861 | -3.5982220 |
| C | -1.1814510 | -0.9066954 | -1.1981039 | C  | 5.7383702  | -2.6366740 | -4.4034858 |
| H | -0.9004317 | 1.3619117  | 3.0794196  | H  | 6.7131064  | -1.2501372 | -3.0172081 |
| H | 0.9057309  | -0.0267859 | -8.9681888 | H  | 6.5941828  | -3.3244049 | -4.4472505 |
| C | 0.5573288  | -0.2006284 | -7.9416289 | O  | -3.4201705 | -0.9235121 | 2.5498175  |
| C | 0.4996164  | 4.2425783  | 1.7797375  | O  | -0.9871412 | 2.4775434  | -0.8449318 |
| H | -1.7661918 | -3.4764713 | -0.3485708 | O  | -1.9827715 | -1.2924911 | -1.9525782 |
| H | -1.4143087 | -3.8972002 | 1.3544986  | N  | -1.1284581 | -0.7177599 | 1.8186189  |
| C | -0.3465902 | -0.6251412 | -5.2815273 | Ru | 0.0668141  | -0.2171565 | -0.0061454 |
| H | 0.8696625  | 2.7872587  | -3.4222502 | N  | 1.0839717  | 0.1626027  | -2.7784370 |
| H | -0.6966621 | -0.7678421 | -4.2506749 | O  | 0.5923611  | -0.3929787 | 5.5915981  |
| C | 2.1670037  | 4.3543942  | -4.2141472 | O  | -0.1257681 | -4.0199088 | 4.0297492  |
| C | 0.4196971  | 2.8930122  | 2.2270204  | P  | 2.0505596  | 0.2343137  | -4.0939555 |
| H | -1.2839294 | -5.1482624 | 0.0794756  | Ru | 0.8203622  | -1.4307743 | 2.7715313  |
| C | -1.1087329 | -4.0754741 | 0.3069616  | N  | 1.8812671  | 1.7908101  | 2.1933856  |
| H | 1.4337186  | 4.6389240  | 1.3653994  | P  | 1.5517612  | 0.3043468  | 1.5710824  |
| C | 1.8028758  | 3.0076913  | -3.9582228 | O  | 1.0572172  | -2.0802216 | 0.6496954  |
| H | 3.6607839  | 5.6905673  | -5.1017112 | Si | 0.7237021  | -3.6744940 | 0.0440220  |
| C | 1.4163084  | 0.0762655  | -6.8482105 | O  | 2.6759738  | -0.3756189 | -1.1935258 |
| C | 0.9683614  | -0.1388612 | -5.5128978 | Ru | 3.0707564  | -1.1592570 | 0.9286672  |
| C | 3.3763519  | 4.6480286  | -4.9042644 | O  | 3.5551416  | -2.4156825 | 3.6358489  |
| H | 1.0384165  | 3.2873675  | 4.6386565  | O  | 4.8767321  | -3.4079875 | -0.0126323 |
| H | 2.4234302  | 0.4648450  | -7.0461991 | O  | 5.6934730  | 0.2551000  | 1.3775115  |
| C | 2.6424306  | 1.9405357  | -4.3921586 | P  | -6.4090262 | 0.2262126  | -0.2968223 |
| H | 0.4948835  | -3.0311435 | -2.3816325 | C  | -7.3740389 | 1.3543817  | 0.8099593  |
| C | 0.2423945  | -3.0347448 | 3.5245192  | C  | -8.4273985 | 0.9332270  | 1.6698773  |
| O | 0.7124197  | -0.7574267 | 4.4890482  | C  | -9.0706487 | 1.8587438  | 2.5358433  |
| H | 1.9048671  | 3.3431478  | 6.9703449  | C  | -8.6783143 | 3.2239285  | 2.5443231  |
| C | 1.4762726  | -0.1144889 | -1.5096325 | C  | -7.6277001 | 3.6555315  | 1.6875139  |
| H | 2.3091153  | 2.2365593  | -0.7047319 | C  | -6.9745381 | 2.7252394  | 0.8392740  |
| C | 4.2174928  | 3.5853104  | -5.3341639 | H  | -8.7443521 | -0.1164382 | 1.6741365  |
| C | 1.8939809  | 2.6546350  | 4.8994539  | H  | -9.8717002 | 1.5131686  | 3.2027569  |
| H | 5.1538925  | 3.8058278  | -5.8640258 | H  | -9.1754825 | 3.9383284  | 3.2135774  |
| C | 3.8519245  | 2.2364879  | -5.0815649 | H  | -7.3111563 | 4.7068186  | 1.6930303  |
| C | 1.1545793  | -3.6999871 | -1.7988293 | H  | -6.1464429 | 3.0655211  | 0.2031574  |
| H | 1.0336787  | -4.7320814 | -2.1913390 | H  | -7.0991924 | -1.4379562 | 0.1246143  |
| C | 2.3865301  | 2.6907737  | 6.2300344  | C  | -6.3846500 | -2.2095580 | 1.0891399  |
| C | 3.0957300  | 2.7756142  | -0.1634082 | C  | -6.8347095 | -3.5057121 | 1.4560305  |
| C | 2.4943589  | 1.8046147  | 3.9251531  | C  | -7.9969246 | -4.0572882 | 0.8500445  |
| H | 4.0067603  | 3.5318669  | -1.9935573 | C  | -8.7053543 | -3.3010596 | -0.1235540 |
| C | 3.1554247  | 2.7244382  | 1.2600488  | C  | -8.2600217 | -2.0011503 | -0.4814739 |
| H | 4.5172368  | 1.4313530  | -5.4160575 | H  | -5.4672843 | -1.8115227 | 1.5489121  |
| H | 2.5325558  | -2.2791071 | -5.6260126 | H  | -6.2737932 | -4.0825830 | 2.2027538  |
| C | 4.0622965  | 3.5079049  | -0.8974798 | H  | -8.3405946 | -5.0624281 | 1.1277657  |
| H | 1.6919398  | -4.8668331 | 2.0569873  | H  | -9.6011675 | -3.7220737 | -0.5990533 |
| H | 2.2028453  | -3.3881859 | -1.9669523 | H  | -8.8146745 | -1.4328663 | -1.2380011 |
| H | 1.4044386  | -5.9699585 | 0.6793685  | C  | -7.1779620 | 0.5621471  | -1.9493290 |
| C | 1.7726835  | -4.9598842 | 0.9583853  | C  | -6.4426495 | 0.1310621  | -3.0944961 |
| C | 3.5065912  | -0.8634321 | -4.2594665 | C  | -6.9316913 | 0.3675936  | -4.4050520 |
| C | 3.4866233  | 1.8748941  | 6.6079287  | C  | -8.1616654 | 1.0568668  | -4.5931451 |
| H | 3.8601144  | 1.8915749  | 7.6409672  | C  | -8.8948566 | 1.5023129  | -3.4593911 |
| C | 3.4412521  | -2.0410365 | -5.0596715 | C  | -8.4074058 | 1.2535803  | -2.1486416 |
| C | 4.1970183  | 3.4261492  | 1.9327386  | H  | -5.4813374 | -0.3830493 | -2.9586735 |
| H | 4.2706654  | 3.4008986  | 3.0256701  | H  | -6.3547002 | 0.0281230  | -5.2751144 |
| C | 2.8263925  | -1.8943359 | 2.8412300  | H  | -8.5413036 | 1.2461639  | -5.6060013 |
| C | 3.6038877  | 0.9955195  | 4.3122256  | H  | -9.8438325 | 2.0378531  | -3.5960812 |
| C | 5.1009279  | 4.2038237  | -0.2199747 | H  | -8.9840414 | 1.6038416  | -1.2838249 |

**Cartesian coordinates after optimization.**

|            |            |            |            |           |            |            |            |
|------------|------------|------------|------------|-----------|------------|------------|------------|
| H          | -2.7433352 | 5.2553073  | 2.4278660  | H         | 2.8407035  | -4.9034598 | 0.6832467  |
| H          | -2.8961946 | 2.8575329  | 3.2128592  | H         | 4.7495712  | 0.2869036  | -2.8601090 |
| C          | -1.8627414 | 4.6004320  | 2.3762867  | H         | 4.0902737  | 0.3288908  | 3.5920929  |
| C          | -1.9482358 | 3.2526211  | 2.8236244  | C         | 5.1647496  | 4.1606928  | 1.1985851  |
| H          | -0.5655591 | 6.1282756  | 1.4974291  | C         | 4.0917808  | 1.0248649  | 5.6420182  |
| H          | -1.4246760 | -0.9035622 | -8.5556965 | H         | 5.8519702  | 4.7684977  | -0.7889891 |
| C          | -2.2919703 | -0.8272177 | 2.1688528  | C         | 4.6971023  | -0.5851200 | -3.5230904 |
| C          | -0.6358048 | 5.0920346  | 1.8533453  | H         | 5.9669657  | 4.6871686  | 1.7323416  |
| H          | -2.2225281 | -1.2781761 | -6.1900828 | C         | 4.1554028  | -2.5647480 | 0.3479690  |
| C          | -0.7577949 | -0.6935308 | -7.7086478 | C         | 4.6577172  | -0.2669901 | 1.2268647  |
| C          | -1.2068276 | -0.9045825 | -6.3770209 | C         | 4.5520209  | -2.9234576 | -5.1312004 |
| H          | 1.5114165  | 5.1686580  | -3.8781735 | H         | 4.9332494  | 0.3778427  | 5.9231035  |
| C          | -0.8135262 | 2.4057381  | 2.7527635  | H         | 4.4865047  | -3.8337091 | -5.7420329 |
| C          | -0.5781162 | 1.4493160  | -0.4741251 | C         | 5.8063429  | -1.4645861 | -3.5982220 |
| C          | -1.1814510 | -0.9066954 | -1.1981039 | C         | 5.7383702  | -2.6366740 | -4.4034858 |
| -0.9004317 | 1.3619117  | 3.0794196  | H          | 6.7131064 | -1.2501372 | -3.0172081 |            |
| H          | 0.9057309  | -0.0267859 | -8.9681888 | H         | 6.5941828  | -3.3244049 | -4.4472505 |
| C          | 0.5573288  | -0.2006284 | -7.9416289 | O         | -3.4201705 | -0.9235121 | 2.5498175  |
| C          | 0.4996164  | 4.2425783  | 1.7797375  | O         | -0.9871412 | 2.4775434  | -0.8449318 |
| H          | -1.7661918 | -3.4764713 | -0.3485708 | O         | -1.9827715 | -1.2924911 | -1.9525782 |
| H          | -1.4143087 | -3.8972002 | 1.3544986  | N         | -1.1284581 | -0.7177599 | 1.8186189  |
| C          | -0.3465902 | -0.6251412 | -5.2815273 | Ru        | 0.0668141  | -0.2171565 | -0.0061454 |
| H          | 0.8696625  | 2.7872587  | -3.4222502 | N         | 1.0839717  | 0.1626027  | -2.7784370 |
| H          | -0.6966621 | -0.7678421 | -4.2506749 | O         | 0.5923611  | -0.3929787 | 5.5915981  |
| C          | 2.1670037  | 4.3543942  | -4.2141472 | O         | -0.1257681 | -4.0199088 | 4.0297492  |
| C          | 0.4196971  | 2.8930122  | 2.2270204  | P         | 2.0505596  | 0.2343137  | -4.0939555 |
| H          | -1.2839294 | -5.1482624 | 0.0794756  | Ru        | 0.8203622  | -1.4307743 | 2.7715313  |
| -1.1087329 | -4.0754741 | 0.3069616  | P          | 1.8812671 | 1.7908101  | 2.1933856  |            |
| H          | 1.4337186  | 4.6389240  | 1.3653994  | N         | 1.5517612  | 0.3043468  | 1.5710824  |
| C          | 1.8028758  | 3.0076913  | -3.9582228 | O         | 1.0572172  | -2.0802216 | 0.6496954  |
| H          | 3.6607839  | 5.6905673  | -5.1017112 | Si        | 0.7237021  | -3.6744940 | 0.0440220  |
| C          | 1.4163084  | 0.0762655  | -6.8482105 | O         | 2.6759738  | -0.3756189 | -1.1935258 |
| O          | 0.9683614  | -0.1388612 | -5.5128978 | Ru        | 3.0707564  | -1.1592570 | 0.9286672  |
| C          | 3.3763519  | 4.6480286  | -4.9042644 | O         | 3.5551416  | -2.4156825 | 3.6358489  |
| H          | 1.0384165  | 3.2873675  | 4.6386565  | O         | 4.8767321  | -3.4079875 | -0.0126323 |
| H          | 2.4234302  | 0.4648450  | -7.0461991 | O         | 5.6934730  | 0.2551000  | 1.3775115  |
| C          | 2.6424306  | 1.9405357  | -4.3921586 | P         | -6.4090262 | 0.2262126  | -0.2968223 |
| H          | 0.4948835  | -3.0311435 | -2.3816325 | C         | -7.3740389 | 1.3543817  | 0.8099593  |
| C          | 0.2423945  | -3.0347448 | 3.5245192  | C         | -8.4273985 | 0.9332270  | 1.6698773  |
| C          | 0.7124197  | -0.7574267 | 4.4890482  | C         | -9.0706487 | 1.8587438  | 2.5358433  |
| H          | 1.9048671  | 3.3431478  | 6.9703449  | C         | -8.6783143 | 3.2239285  | 2.5443231  |
| C          | 1.4762726  | -0.1144889 | -1.5096325 | C         | -7.6277001 | 3.6555315  | 1.6875139  |
| H          | 2.3091153  | 2.2365593  | -0.7047319 | C         | -6.9745381 | 2.7252394  | 0.8392740  |
| C          | 4.2174928  | 3.5853104  | -5.3341639 | H         | -8.7443521 | -0.1164382 | 1.6741365  |
| H          | 1.8939809  | 2.6546350  | 4.8994539  | H         | -9.8717002 | 1.5131686  | 3.2027569  |
| H          | 5.1538925  | 3.8058278  | -5.8640258 | H         | -9.1754825 | 3.9383284  | 3.2135774  |
| C          | 3.8519245  | 2.2364879  | -5.0815649 | H         | -7.3111563 | 4.7068186  | 1.6930303  |
| C          | 1.1545793  | -3.6999871 | -1.7988293 | H         | -6.1464429 | 3.0655211  | 0.2031574  |
| H          | 1.0336787  | -4.7320814 | -2.1913390 | C         | -7.0991924 | -1.4379562 | 0.1246143  |
| C          | 2.3865301  | 2.6907737  | 6.2300344  | C         | -6.3846500 | -2.2095580 | 1.0891399  |
| C          | 3.0957300  | 2.7756142  | -0.1634082 | C         | -6.8347095 | -3.5057121 | 1.4560305  |
| C          | 2.4943589  | 1.8046147  | 3.9251531  | C         | -7.9969246 | -4.0572882 | 0.8500445  |
| H          | 4.0067603  | 3.5318669  | -1.9935573 | C         | -8.7053543 | -3.3010596 | -0.1235540 |
| C          | 3.1554247  | 2.7244382  | 1.2600488  | C         | -8.2600217 | -2.0011503 | -0.4814739 |
| H          | 4.5172368  | 1.4313530  | -5.4160575 | H         | -5.4672843 | -1.8115227 | 1.5489121  |
| H          | 2.5325558  | -2.2791071 | -5.6260126 | H         | -6.2737932 | -4.0825830 | 2.2027538  |
| C          | 4.0622965  | 3.5079049  | -0.8974798 | H         | -8.3405946 | -5.0624281 | 1.1277657  |
| H          | 1.6919398  | -4.8668331 | 2.0569873  | H         | -9.6011675 | -3.7220737 | -0.5990533 |
| H          | 2.2028453  | -3.3881859 | -1.9669523 | H         | -8.8146745 | -1.4328663 | -1.2380011 |
| H          | 1.4044386  | -5.9699585 | 0.6793685  | C         | -7.1779620 | 0.5621471  | -1.9493290 |
| C          | 1.7726835  | -4.9598842 | 0.9583853  | C         | -6.4426495 | 0.1310621  | -3.0944961 |
| C          | 3.5065912  | -0.8634321 | -4.2594665 | C         | -6.9316913 | 0.3675936  | -4.4050520 |
| C          | 3.4866233  | 1.8748941  | 6.6079287  | C         | -8.1616654 | 1.0568668  | -4.5931451 |
| H          | 3.8601144  | 1.8915749  | 7.6409672  | C         | -8.8948566 | 1.5023129  | -3.4593911 |
| C          | 3.4412521  | -2.0410365 | -5.0596715 | C         | -8.4074058 | 1.2535803  | -2.1486416 |
| C          | 4.1970183  | 3.4261492  | 1.9327386  | H         | -5.4813374 | -0.3830493 | -2.9586735 |
| H          | 4.2706654  | 3.4008986  | 3.0256701  | H         | -6.3547002 | 0.0281230  | -5.2751144 |
| C          | 2.8263925  | -1.8943359 | 2.8412300  | H         | -8.5413036 | 1.2461639  | -5.6060013 |
| C          | 3.6038877  | 0.9955195  | 4.3122256  | H         | -9.8438325 | 2.0378531  | -3.5960812 |
| C          | 5.1009279  | 4.2038237  | -0.2199747 | H         | -8.9840414 | 1.6038416  | -1.2838249 |

#### 4. Crystallographic details

##### **X-ray data collection, structure solution and refinement for compounds **2/3** and **3·0.5CH<sub>3</sub>OH**.**

Suitable crystals for the X-ray analysis of complexes **2/3** and **3·0.5CH<sub>3</sub>OH** were obtained by evaporation of dichloromethane/methanol solutions. The intensity data was collected at room temperature on a Bruker area detector AXS Smart 1000 (graphite monochromated MoK $\alpha$  radiation,  $\lambda = 0.71073$  Å). Crystallographic and experimental details for the structures are summarized in Table S-6. Bruker SADABS software [maximum and minimum transmission coefficient values: 1.000 and 0.860 (**2/3**), 1.000 and 0.671 (**3·0.5CH<sub>3</sub>OH**)] was used for the absorption correction. The structures were solved by direct methods and refined by full-matrix least-squares procedures (based on  $F_o^2$ , SHELX-97) first with isotropic thermal parameters and then with anisotropic thermal parameters in the last cycles of refinement for all the non-hydrogen. The hydrogen atoms were introduced into the geometrically calculated positions and refined *riding* on the corresponding parent atoms. The occupancy factors for N1, C8, O8 and C11 (0.4, 0.4, 0.4 and 0.6, respectively) in **2/3** were refined unconstrained in the isotropic model and then constrained to the obtained value in the anisotropic one. CCDC-xxxxxxx (**2/3**), CCDC-xxxxxxx (**3·0.5CH<sub>3</sub>OH**), contain the supplementary crystallographic data for this paper that can be obtained free of charge from the Cambridge Crystallographic Data Centre via [www.ccdc.cam.ac.uk/data\\_request/cif](http://www.ccdc.cam.ac.uk/data_request/cif). A list of selected refinement parameters is reported in table S-6. Ortep views of the molecular structures of compound **2** and **3** are reported in figures S-2 and S-3.

**Table S-6:** X-ray data collection, structure solution and refinement parameters for compounds **2/3** and **3·0.5CH<sub>3</sub>OH**.

| Complexes                                   | <b>2/3</b>                                                                                                                  | <b>3·0.5CH<sub>3</sub>OH</b>                                                                                          |
|---------------------------------------------|-----------------------------------------------------------------------------------------------------------------------------|-----------------------------------------------------------------------------------------------------------------------|
| <b>Formula</b>                              | C <sub>47.40</sub> H <sub>39</sub> Cl <sub>0.60</sub> N <sub>2.40</sub> O <sub>9.40</sub> P <sub>2</sub> Ru <sub>3</sub> Si | C <sub>47.50</sub> H <sub>43</sub> Cl <sub>1</sub> N <sub>2</sub> O <sub>9.50</sub> P <sub>2</sub> Ru <sub>3</sub> Si |
| <b>FW</b>                                   | 1207.12                                                                                                                     | 1220.51                                                                                                               |
| <b>Crystal System</b>                       | Triclinic                                                                                                                   | Triclinic                                                                                                             |
| <b>Space Group</b>                          | <i>P</i> -1                                                                                                                 | <i>P</i> -1                                                                                                           |
| <b>a, Å</b>                                 | 11.6159(7)                                                                                                                  | 11.608(3)                                                                                                             |
| <b>b, Å</b>                                 | 13.3036(7)                                                                                                                  | 13.277(3)                                                                                                             |
| <b>c, Å</b>                                 | 17.140(1)                                                                                                                   | 17.196(3)                                                                                                             |
| <b>α, °</b>                                 | 98.473(1)                                                                                                                   | 81.920(3)                                                                                                             |
| <b>β, °</b>                                 | 90.88(3)                                                                                                                    | 89.945(3)                                                                                                             |
| <b>γ, °</b>                                 | 104.370(1)                                                                                                                  | 76.225(3)                                                                                                             |
| <b>V, Å<sup>3</sup></b>                     | 2535.2(3)                                                                                                                   | 2547(1)                                                                                                               |
| <b>Z</b>                                    | 2                                                                                                                           | 1                                                                                                                     |
| <b>D<sub>calcd</sub>, g cm<sup>-3</sup></b> | 1.581                                                                                                                       | 1.591                                                                                                                 |
| <b>F(000)</b>                               | 1203                                                                                                                        | 1281                                                                                                                  |
| <b>Crystal size (mm)</b>                    | 0.2 × 0.1 × 0.1                                                                                                             | 0.2 × 0.2 × 0.1                                                                                                       |
| <b>μ, cm<sup>-1</sup></b>                   | 10.55                                                                                                                       | 10.72                                                                                                                 |
| <b>Rflns. collected</b>                     | 22509                                                                                                                       | 27031                                                                                                                 |
| <b>Rflns. unique</b>                        | 7973                                                                                                                        | 10474                                                                                                                 |
| <b>Rflns. observed</b>                      | 4879                                                                                                                        | 7729                                                                                                                  |
| <b>[I &gt; 2σ(I)]</b>                       |                                                                                                                             |                                                                                                                       |
| <b>Parameters</b>                           | 613                                                                                                                         | 604                                                                                                                   |
| <b>R Indices</b>                            | <i>R</i> 1 = 0.0380,                                                                                                        | <i>R</i> 1 = 0.0350,                                                                                                  |
| <b>[I &gt; 2σ(I)]</b>                       | <i>w</i> <i>R</i> 2 = 0.0799                                                                                                | <i>w</i> <i>R</i> 2 = 0.0539                                                                                          |
| <b>R Indices</b>                            | <i>R</i> 2 = 0.0536,                                                                                                        | <i>R</i> 2 = 0.0843,                                                                                                  |
| <b>(all data)</b>                           | <i>w</i> <i>R</i> 2 = 0.0584                                                                                                | <i>w</i> <i>R</i> 2 = 0.0883                                                                                          |

**Figure S-2:** Ortep view of the crystallographic model obtained from the data collected from a crystal formed by a 2:3 mixture by clusters **2** and **3** (Displacement parameters include 30% of the electron density).

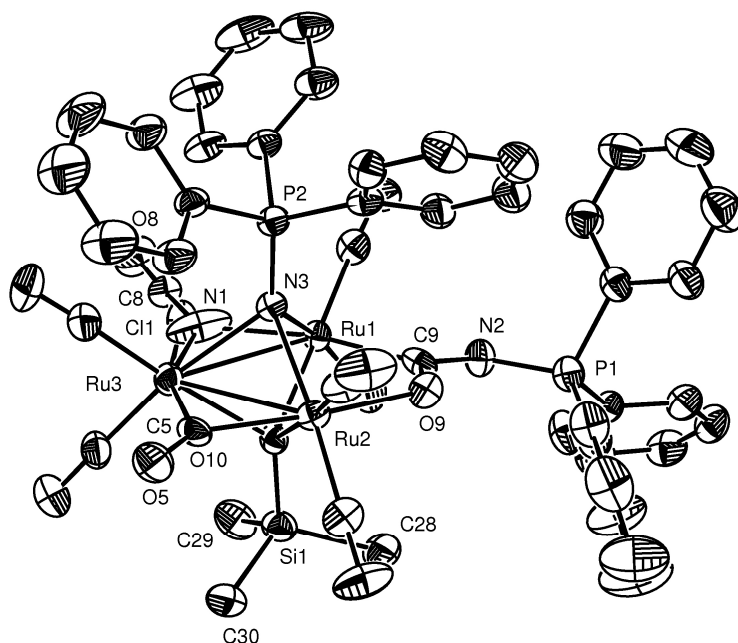

**Figure S-3:** Ortep view of the crystal structure of cluster **3** in  $3 \cdot \text{CH}_3\text{OH}$  (Displacement parameters include 30% of the electron density).

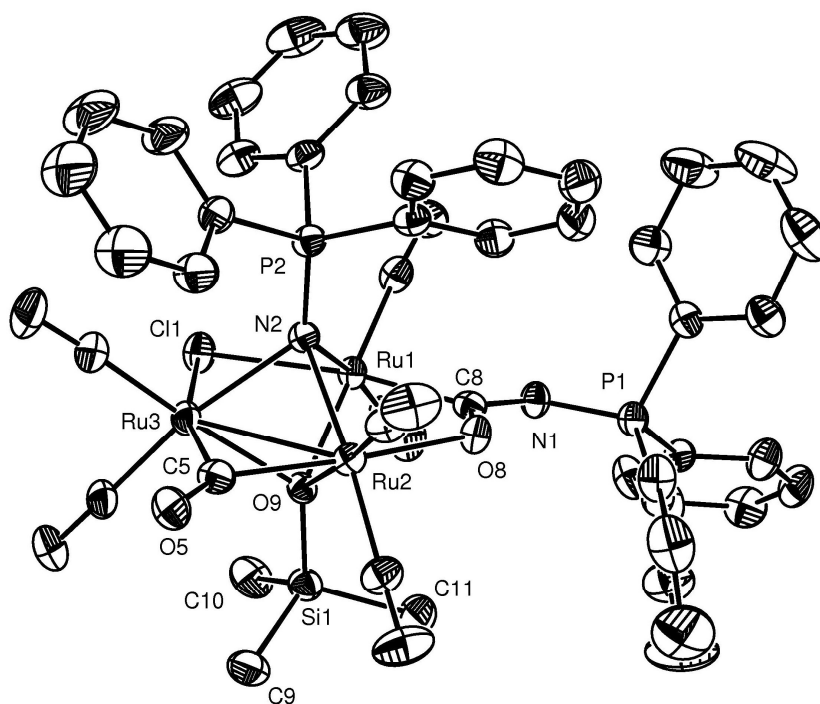

## 5. References

- S1 R. Ahlrichs, M. Bär, M. Häser, H. Horn, C. Kölmel, *Chem. Phys. Lett.* 1989, **162**, 165.
- S2 A. D. Becke, *Phys. Rev.* 1988, **A 38**, 3098.
- S3 K. Eichkorn, O. Treutler, H. Ohm, M. Häser, R. Ahlrichs, *Chem. Phys. Lett.* 1995, **240**, 283.
- S4 A. Schäfer, H. Horn, R. Ahlrichs, *J. Chem. Phys.* 1992, **97**, 2571.
- S5 A. Schäfer, C. Huber, R. Ahlrichs, *J. Chem. Phys.* 1994, **100**, 5829.
- S6 *SAINTE Software Users Guide; SMART Software Users Guide*; Bruker Analytical X-ray Systems: Madison, WI, **1999**;
- S7 Sheldrick, G. M. *SADABS*; Bruker Analytical X-ray Systems, Madison, WI, **1999**.
- S8 Sheldrick, M.; *SHELXL-97*, Program for crystal structure refinement; University of Göttingen: Germany, **1997**.
